# Supplementary material
Source: Springer Nature journal article supplement (https://www.springermedizin.de/resource/supplementary/13075_2009_2741_MOESM4_ESM.pdf/9692778)

C

## AUSCAN Stiffness

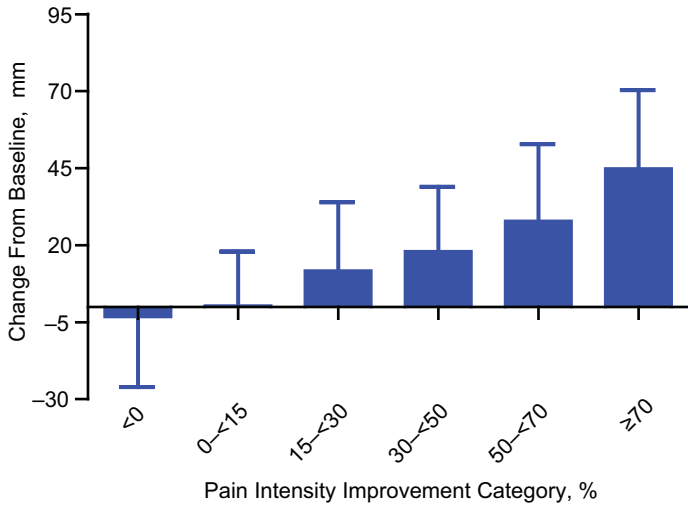

Supplement: MOESM4 [file 9692778]
